Articles of interest in other COB journals

From *Journal of Cell Science*

**In vivo analysis of undocked connexin43 gap junction hemichannels in ovarian granulosa cells**

Dan Tong, Tony Y. Li, Kathryn E. Naus, Donglin Bai and Gerald M. Kidder

Tong, D. et al. 2007. *J. Cell Sci.* doi: 10.1242/jcs.011775

**Mitochondrial DNA replication during differentiation of murine embryonic stem cells**

Joao M. Facucho-Oliveira, Jon Alderson, Emma C. Spikings, Stuart Egginton and Justin C. St. John

Facucho-Oliveira, J. M. et al. 2007. *J. Cell Sci.* doi: 10.1242/jcs.016972
